# Supplementary material for: Multiple nitrogen sources for primary production inferred from δ 13 C and δ 15 N in the southern Sea of Japan
Source: Copernicus journal article supplement (doi:10.5194/bg-20-3667-2023), 2023-09-13
Supplement: Supplementary file 1 [file bg-20-3667-2023-supplement.pdf]

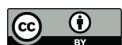

*Supplement of*

## **Multiple nitrogen sources for primary production inferred from $\delta^{13}\text{C}$ and $\delta^{15}\text{N}$ in the southern Sea of Japan**

**Taketoshi Kodama et al.**

*Correspondence to:* Taketoshi Kodama ([takekodama@g.ecc.u-tokyo.ac.jp](mailto:takekodama@g.ecc.u-tokyo.ac.jp))

The copyright of individual parts of the supplement might differ from the article licence.

## Introduction S1.

The linear relationships between  $\delta^{13}\text{C}_{\text{POM}}$  or  $\delta^{15}\text{N}_{\text{POM}}$  and temperature, salinity, log-transformed nitrate concentration, log-transformed chlorophyll-*a* concentration, C: N ratio, latitude, and longitude were not shown in the main text because  $\delta^{13}\text{C}_{\text{POM}}$  or  $\delta^{15}\text{N}_{\text{POM}}$  did not show the normal distributions. However, the relationships were the basic information, and thus we showed them in the supporting information.

## Text S1.

When the classification of  $\delta^{13}\text{C}_{\text{POM}}$  and  $\delta^{15}\text{N}_{\text{POM}}$  was ignored, the linear relationships between  $\delta^{13}\text{C}_{\text{POM}}$  and temperature, salinity, log-transformed nitrate concentration, log-transformed chlorophyll-*a* concentration, C: N ratio, and latitude were significant ( $p < 0.001$ ,  $\text{DF} = 505$ ). However, the relationship between  $\delta^{13}\text{C}_{\text{POM}}$  and longitude was insignificant ( $p = 0.33$ ,  $\text{DF} = 505$ ) (Fig. S1a–g). The most robust relationship was observed between  $\delta^{13}\text{C}_{\text{POM}}$  and temperature ( $r^2 = 0.314$ ,  $F\text{-value} = 231$ ,  $p < 0.001$ ), with  $\delta^{13}\text{C}_{\text{POM}}$  increasing with warming (Fig. S1a). The second most robust relationship was observed between  $\delta^{13}\text{C}_{\text{POM}}$  and log-transformed nitrate concentration ( $r^2 = 0.252$ ,  $F\text{-value} = 171$ ,  $p < 0.001$ ),  $\delta^{13}\text{C}_{\text{POM}}$  high in low-nitrate water (Fig. S1c). A weak ( $r^2 < 0.05$ ) but significant relationship was observed between  $\delta^{13}\text{C}_{\text{POM}}$  and log-transformed chlorophyll-*a* concentration, C:N ratio, and latitude (Fig. S1d–f). The relationship between  $\delta^{13}\text{C}_{\text{POM}}$  and nitrate concentration, which was not log-transformed, was also significantly negative ( $r^2 = 0.172$ ;  $F = 106$ ).

In the case of  $\delta^{15}\text{N}_{\text{POM}}$ , significant linear relationships were observed between temperature, salinity, log-transformed nitrate concentration, and latitude ( $p < 0.002$ ,  $\text{DF} = 505$ ) but not between log-transformed chlorophyll-*a* concentration, C: N ratio, and longitude (Fig. S1h–n). Compared to  $\delta^{13}\text{C}_{\text{POM}}$ , the relationships were weak; the detection coefficient ( $r^2$ ) was always  $< 0.05$ . The relationship with logarithm-transformed nitrate concentration was negative ( $r^2 = 0.011$ ,  $F\text{-value} = 6.42$ ). Moreover, this relationship was similar when nitrate concentration was not transformed ( $r^2 = 0.023$ ,  $F\text{-value} = 13.2$ ). Positive and negative relationships were observed for temperature ( $r^2 = 0.016$ ,  $F\text{-value} = 9.45$ ) and salinity ( $r^2 = 0.02$ ,  $F\text{-value} = 11.5$ ).

These relationships have ignored the classification; class I, whose  $\delta^{15}\text{N}_{\text{POM}}$  was significantly lower than the other classes (II–IV), appeared as outliers in the relationships. When data classified into class I was removed, significant relationships between  $\delta^{15}\text{N}_{\text{POM}}$  and environmental parameters were only observed for salinity and latitude ( $p < 0.001$ ).

**Fig. S1.** Relationships between  $\delta^{13}\text{C}_{\text{POM}}$  (a–g) or  $\delta^{15}\text{N}_{\text{POM}}$  (h–n) and environmental parameters (temperature, salinity, nitrate concentration, chlorophyll-*a* concentration, C: N ratio, latitude, and longitude). The color and shape differences indicate classes divided based on  $\delta^{13}\text{C}_{\text{POM}}$  and  $\delta^{15}\text{N}_{\text{POM}}$ . Solid lines with shadows indicate significant regression lines with 95 % confidence intervals, whereas dotted lines indicate insignificant regression lines.

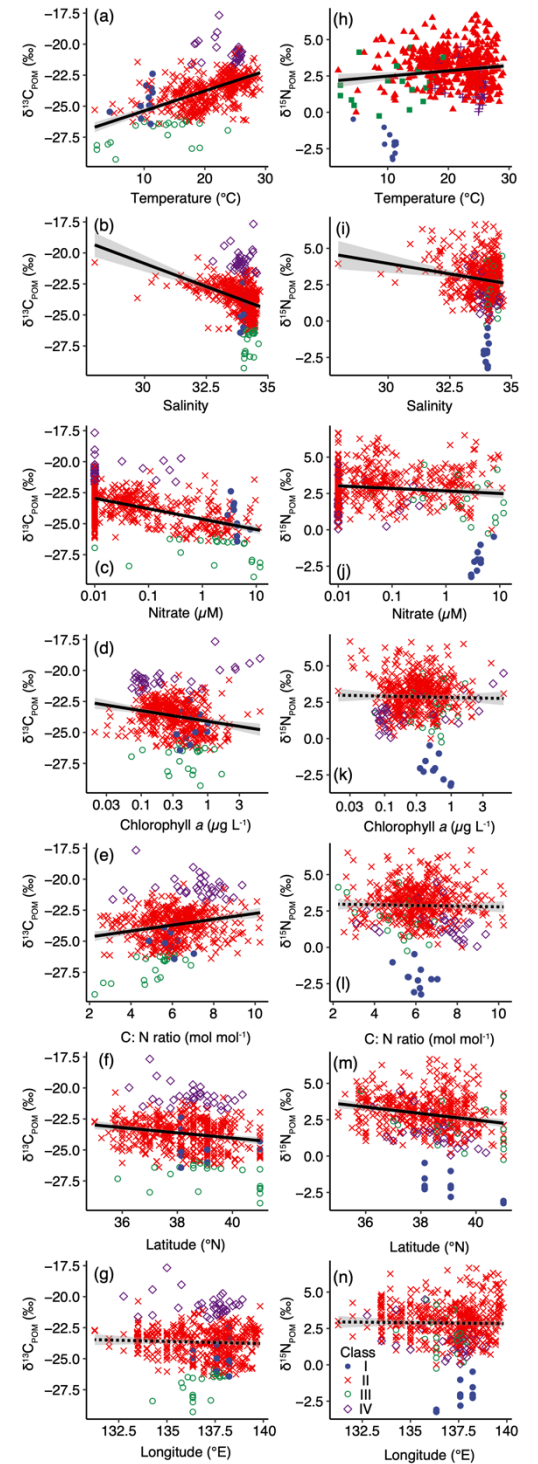

## 60 Introduction S2.

Simulation results are not shown in the main text. The simulations were conducted with random numbers, and thus the results were different among the simulations.

### Text S2.

65 Here, two types of simulation of the relationship between the  $\delta^{15}\text{N}_{\text{POM}}$  and nitrate concentration were performed. The difference between the two is only the  $\delta^{15}\text{N}_{\text{NO}_3}$  range: the first one was set as 0–8.3‰ (Umezawa et al., 2014; Umezawa et al., 2021), and the second one was set it as 5–6‰, which was the representative  $\delta^{15}\text{N}_{\text{NO}_3}$  in the water originating from the Kuroshio (Umezawa et al., 2014; Umezawa et al., 2021). The other parameter was the same between the two simulations, that is, the kinetic isotope effects of nitrate assimilation ( $\epsilon_{\text{NO}_3}$ ) is 3‰ (Sigman et al., 2009), the initial nitrate concentration ( $[\text{NO}_3]_{\text{ini}}$ ) to 0.05–10  $\mu\text{M}$ , and the fraction of remaining nitrate ( $F_{\text{NO}_3}$ ) was set as 0–0.5. We assumed the open system and thus  $\delta^{15}\text{N}_{\text{POM}}$  originated from the nitrate ( $\delta^{15}\text{N}_{\text{POM-NO}_3}$ ) was calculated from the equation of Sigman et al. (2009) ( $\delta^{15}\text{N}_{\text{POM-NO}_3} = \delta^{15}\text{N}_{\text{NO}_3} - \epsilon_{\text{NO}_3} \times F_{\text{NO}_3}$ ). Regenerated nitrogen such as ammonium also supports primary production, but the kinetic isotope effect of nutrient recycling is not clear (Sigman et al., 2009), and  $\delta^{15}\text{N}$  of ammonium depends on  $\delta^{15}\text{N}_{\text{POM}}$ . Thus, it was possible to regard that  $\delta^{15}\text{N}_{\text{POM}}$  based on the regenerated production is as the same as  $\delta^{15}\text{N}_{\text{POM}}$  based on the new production. To consider the regenerated production, the  $F_{\text{NO}_3}$  was set as <0.5. Here, nitrate is not only the nitrogen supporting new production. Nitrogen fixation is also an important process in the SOJ and contributed ~3.8% to primary production (Sato et al., 2021). In the SOJ, the contribution of nitrogen fixation to new production ( $f_{\text{N}_2}$ ) was not reported, but that in the East China Sea was reported as 10–82% in summer (Liu et al., 2013).  $\delta^{15}\text{N}_{\text{POM}}$  produced with nitrogen fixation ( $\delta^{15}\text{N}_{\text{POM-N}_2}$ ) was set at -2.1–0.8‰ (Minagawa and Wada, 1986). In  
80 hence,  $\delta^{15}\text{N}_{\text{POM}}$  was calculated as the following equation.

$$\delta^{15}\text{N}_{\text{POM}} = (1-f_{\text{N}_2}) \times (\delta^{15}\text{N}_{\text{NO}_3} - \epsilon_{\text{NO}_3} \times F_{\text{NO}_3}) + f_{\text{N}_2} \times \delta^{15}\text{N}_{\text{POM-N}_2} \quad (1)$$

Except with  $\epsilon_{\text{NO}_3}$ , these values varied randomly between the setting ranges, and 500 data points were prepared to identify each linear relationship between  $\delta^{15}\text{N}_{\text{POM}}$  and remnant nitrate concentration ( $= [\text{NO}_3]_{\text{ini}} \times F_{\text{NO}_3}$ ). To identify the proportions of the appearance of a significant relationship between the  $\delta^{15}\text{N}_{\text{POM}}$  and nitrate concentration, we conducted  
85 each simulation 1000 times. The one representative results of the first simulation ( $\delta^{15}\text{N}_{\text{NO}_3}$  range: 0–8.3‰) denote that the relationship between  $\delta^{15}\text{N}_{\text{POM}}$  and nitrate concentration was weak and insignificant ( $n = 500$ ,  $p = 0.789$ , Fig. S2a). Since the data point was set at random, approximately seven of ten times showed an insignificant ( $p > 0.05$ ) relationship between  $\delta^{15}\text{N}_{\text{POM}}$  and nitrate concentration (Fig. S2b). On the other hand, in the second simulation ( $\delta^{15}\text{N}_{\text{NO}_3}$  range: 5–6‰), the relationship between  $\delta^{15}\text{N}_{\text{POM}}$  and nitrate concentration showed a significant negative relationship ( $n = 500$ ,  $p < 10^{-16}$ , Fig. S2c). While the nitrogen fixation contribution was the same in the first simulation, the relationship between  
90  $\delta^{15}\text{N}_{\text{POM}}$  and nitrate concentration was always significant ( $p < 0.05$ , Fig. S2d).

This  $f_{\text{N}_2}$  based on Liu et al. (2013) may be much higher in the actual contribution of nitrogen fixation to  $\delta^{15}\text{N}_{\text{POM}}$ , and when  $f_{\text{N}_2}$  was set as low, the relationship between  $\delta^{15}\text{N}_{\text{POM}}$  and nitrate concentration became stronger than high  $f_{\text{N}_2}$  case (Fig. S2e). Thus, we set  $f_{\text{N}_2}$  as 1.9–5.8% which were corresponding to the contribution of nitrogen fixation to primary production (Liu et al., 2013). Even in this case, an insignificant relationship between  $\delta^{15}\text{N}_{\text{POM}}$  and nitrate concentration was observed approximately 30% of the trials (Fig. S2f). This indicated that a wide range of  $\delta^{15}\text{N}_{\text{NO}_3}$  values contributed to an unclear relationship between  $\delta^{15}\text{N}_{\text{POM}}$  and nitrate concentration, which is observed in our study conducted in the SOJ.

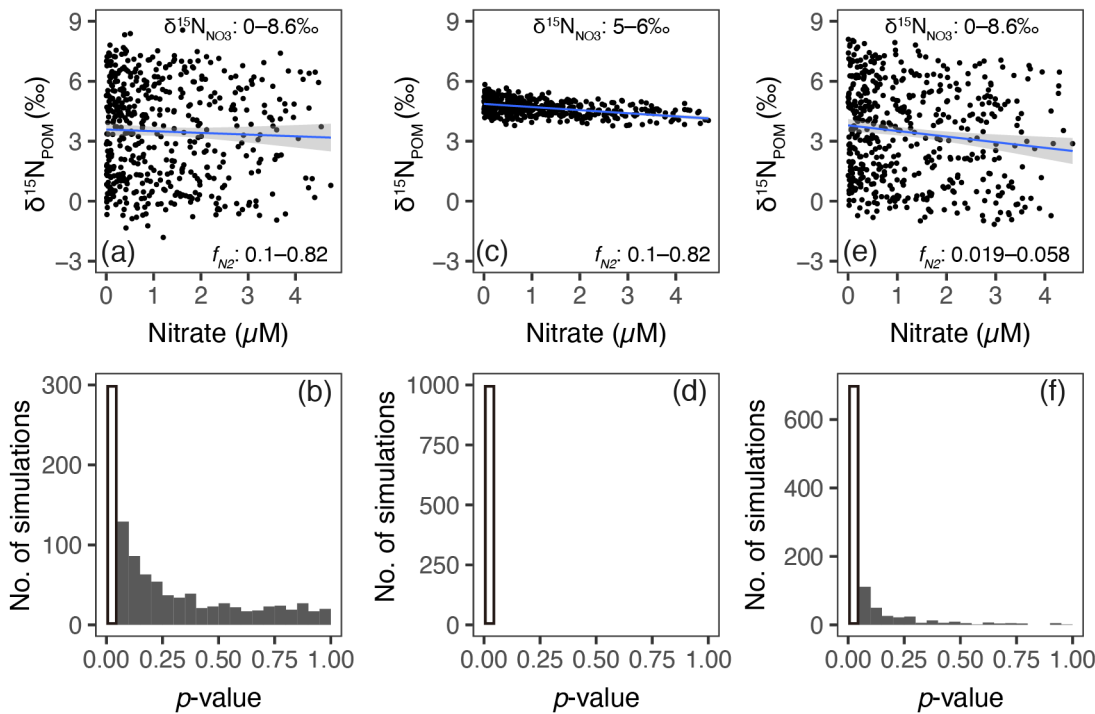

**Fig. S2.** The results of the simulations when the  $\delta^{15}\text{N}_{\text{NO}_3}$  varies 0 – 8.3‰ and the contribution of nitrogen fixation ( $f_{\text{N}_2}$ ) was 10–82% (a and b), those  $\delta^{15}\text{N}_{\text{NO}_3}$  varies 5 – 6‰ and  $f_{\text{N}_2}$  was 10–82% (c and d), and those  $\delta^{15}\text{N}_{\text{NO}_3}$  varies 0 – 8.3‰ and  $f_{\text{N}_2}$  was 1.9–5.8% (e and f). (a), (c) and (e) denote the representative result of their relationship of each simulation, and (b), (d) and (f) were the histograms of the  $p$ -values of simulations repeated 1000 times. The open bar in (b), (d) and (f) denote the  $p$ -values were  $\geq 0.05$  (significant), and the closed bars denote  $p$ -values were  $< 0.05$ .

## References

- Liu, X., Furuya, K., Shiozaki, T., Masuda, T., Kodama, T., Sato, M., Kaneko, H., Nagasawa, M., and Yasuda, I.: Variability in nitrogen sources for new production in the vicinity of the shelf edge of the East China Sea in summer, *Cont. Shelf Res.*, 61–62, 23–30, 10.1016/j.csr.2013.04.014, 2013.
- Minagawa, M. and Wada, E.: Nitrogen isotope ratios of red tide organisms in the East China Sea: A characterization of biological nitrogen fixation, *Mar. Chem.*, 19, 245–259, 10.1016/0304-4203(86)90026-5, 1986.
- Sato, T., Shiozaki, T., Taniuchi, Y., Kasai, H., and Takahashi, K.: Nitrogen fixation and diazotroph community in the subarctic Sea of Japan and Sea of Okhotsk, *J. Geophys. Res. Oceans*, 126, e2020JC017071, 10.1029/2020jc017071, 2021.
- Sigman, D. M., Karsh, K. L., and Casciotti, K. L.: Nitrogen isotopes in the ocean, in: *Encyclopedia of Ocean Sciences*, edited by: Steele, J. H., Academic Press, Oxford, 40–54, 10.1016/b978-012374473-9.00632-9, 2009.
- Umezawa, Y., Toyoshima, K., Saitoh, Y., Takeda, S., Tamura, K., Tamaya, C., Yamaguchi, A., Yoshimizu, C., Tayasu, I., and Kawamoto, K.: Evaluation of origin-depended nitrogen input through atmospheric deposition and its effect on primary production in coastal areas of western Kyushu, Japan, *Environ. Pollut.*, 291, 118034, 10.1016/j.envpol.2021.118034, 2021.
- Umezawa, Y., Yamaguchi, A., Ishizaka, J., Hasegawa, T., Yoshimizu, C., Tayasu, I., Yoshimura, H., Morii, Y., Aoshima, T., and Yamawaki, N.: Seasonal shifts in the contributions of the Changjiang River and the Kuroshio Current to nitrate

dynamics in the continental shelf of the northern East China Sea based on a nitrate dual isotopic composition approach, Biogeosciences, 11, 1297-1317, 10.5194/bg-11-1297-2014, 2014.
